# Supplementary material for: Biochar–silver nanocomposites derived from Borassus flabellifer bark for rapid catalytic reduction of organic pollutants in wastewater
Source: Royal Society of Chemistry journal article supplement (doi:10.1039/d5nj03733f), 2025-11-18
Supplement: d5nj03733f1.pdf [file d5nj03733f1.pdf]

## Supplementary data

**Figure S1.** XPS spectra for the Ag@PBC 300 a) Ag@PBC survey, b) C1s, O1s and d) Ag3d.

**Figure S2.** XPS spectra for the Ag@PBC 400 a) Ag@PBC survey, b) C1s, O1s and d) Ag3d.

**Figure S3.** XPS spectra for the Ag@PBC 600 a) Ag@PBC survey, b) C1s, O1s and d) Ag3d.

**Figure S4.** EDS spectra and elemental composition of (a) PBC and (b) Ag@PBC composite.

**Figure S5.** TEM images of Ag@PBC 300 composite at different magnifications (a–c) and the SAED pattern (d).

**Figure S6.** TEM images of Ag@PBC 400 composite at different magnifications (a–c) and the SAED pattern (d).

**Figure S7.** TEM images of Ag@PBC 600 composite at different magnifications (a–c) and the SAED pattern (d).

**Figure S8.** N<sub>2</sub> adsorption-desorption isotherms biochar a) PBC 300, b) PBC 600 and composites c) Ag@PBC 300 & d) Ag@PBC 600.

**Figure S9.** Time-dependent UV–Vis spectra showing the catalytic reduction of 4-nitrophenol to 4-aminophenol using Ag@PBC 300 at different molar ratios of 4-NP:NaBH<sub>4</sub>: (a) 1:5, (b) 1:10, (c) 1:25, (d) 1:50, (e) 1:75, and (f) 1:100.

**Figure S10.** Time-dependent UV–Vis spectra showing the catalytic reduction of 4-nitrophenol to 4-aminophenol using Ag@PBC 400 at different molar ratios of 4-NP:NaBH<sub>4</sub>: (a) 1:5, (b) 1:10, (c) 1:25, (d) 1:50, (e) 1:75, and (f) 1:100.

**Figure S11.** Time-dependent UV–Vis spectra showing the catalytic reduction of 4-nitrophenol to 4-aminophenol using Ag@PBC 500 at different molar ratios of 4-NP:NaBH<sub>4</sub>: (a) 1:5, (b) 1:10, (c) 1:25, (d) 1:50, (e) 1:75, and (f) 1:100.

**Figure S12.** Time-dependent UV–Vis spectra showing the catalytic reduction of 4-nitrophenol to 4-aminophenol using Ag@PBC 600 at different molar ratios of 4-NP:NaBH<sub>4</sub>: (a) 1:5, (b) 1:10, (c) 1:25, (d) 1:50, (e) 1:75, and (f) 1:100.

**Figure S13.** Time-dependent of absorbance showing the reduction of CR and MO at different concentrations 25ppm (a and d), 50ppm (b and e) and 100ppm (c and f) catalyzed by Ag@PBC 300.

**Figure S14.** Time-dependent of absorbance showing the reduction of CR and MO at different concentrations 25ppm (a and d), 50ppm (b and e) and 100ppm (c and f) catalyzed by Ag@PBC 400.

**Figure S15.** Time-dependent of absorbance showing the reduction of CR and MO at different concentrations 25ppm (a and d), 50ppm (b and e) and 100ppm (c and f) catalyzed by Ag@PBC 600.

**Figure S16.** Reusability of Ag@PBC catalysts over 10 cycles.

**Figure S17.** FTIR spectra of the Ag@PBC composites after 10<sup>th</sup> catalytic cycles.

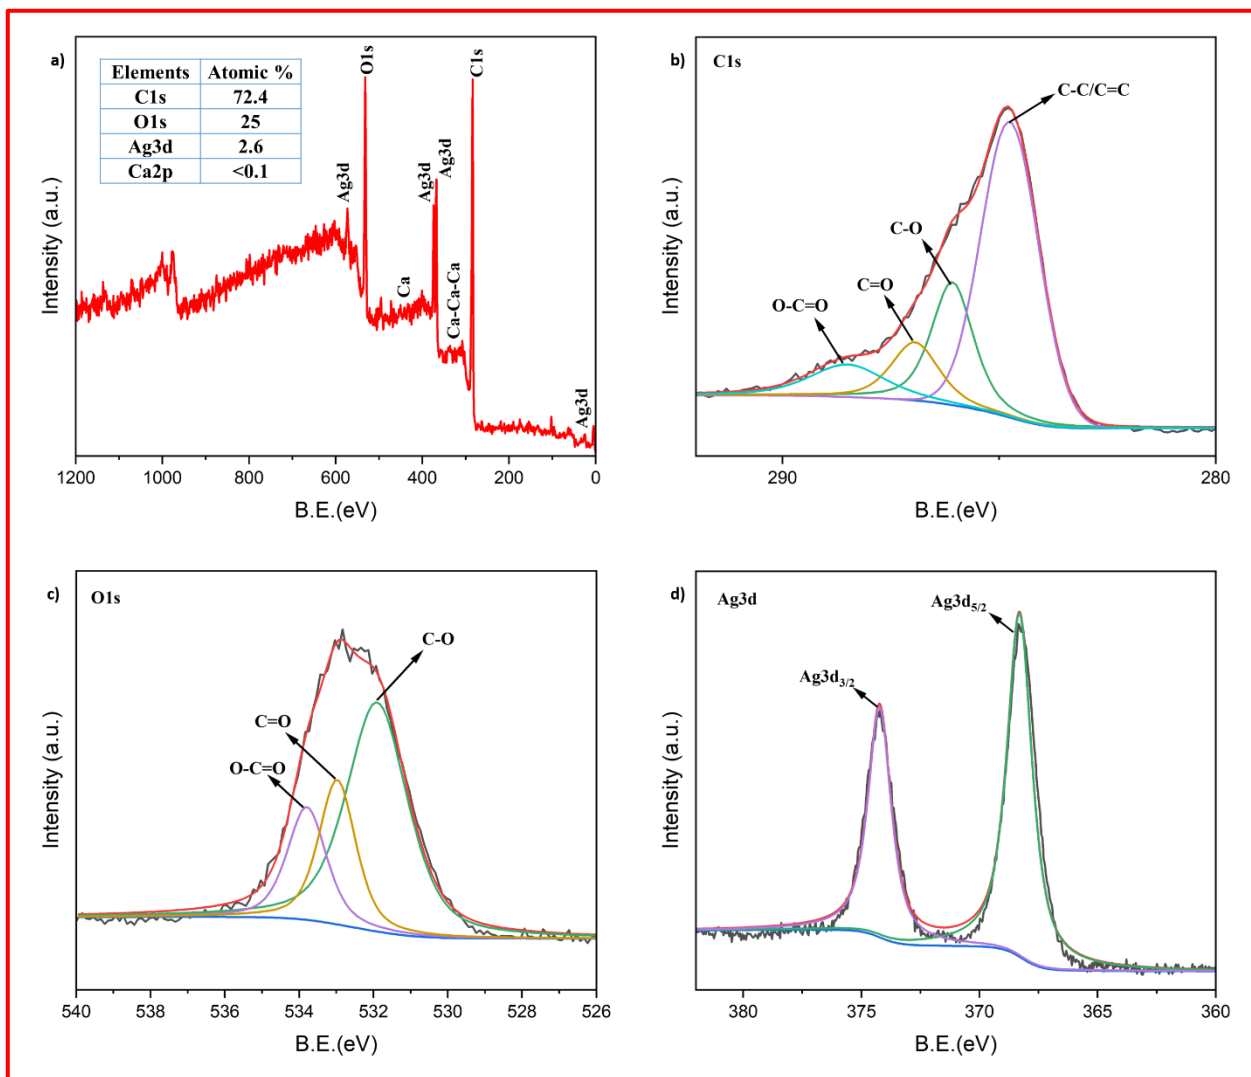

**Figure S1.** XPS spectra for the Ag@PBC 300 a) Ag@PBC survey, b) C1s, O1s and d) Ag3d.

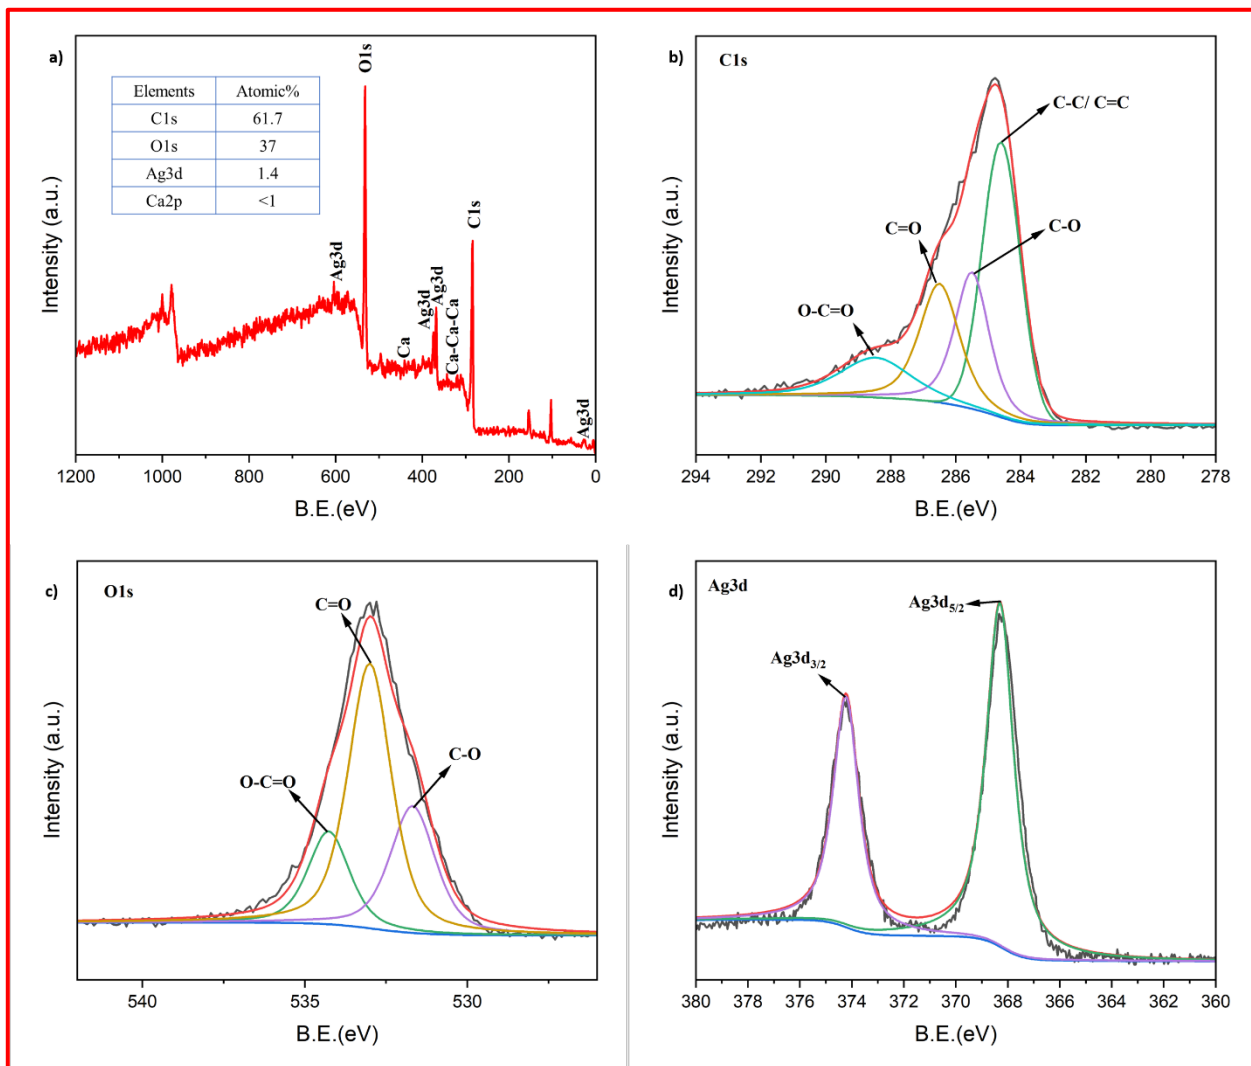

**Figure S2.** XPS spectra for the Ag@PBC 400 a) Ag@PBC survey, b) C1s, O1s and d) Ag3d.

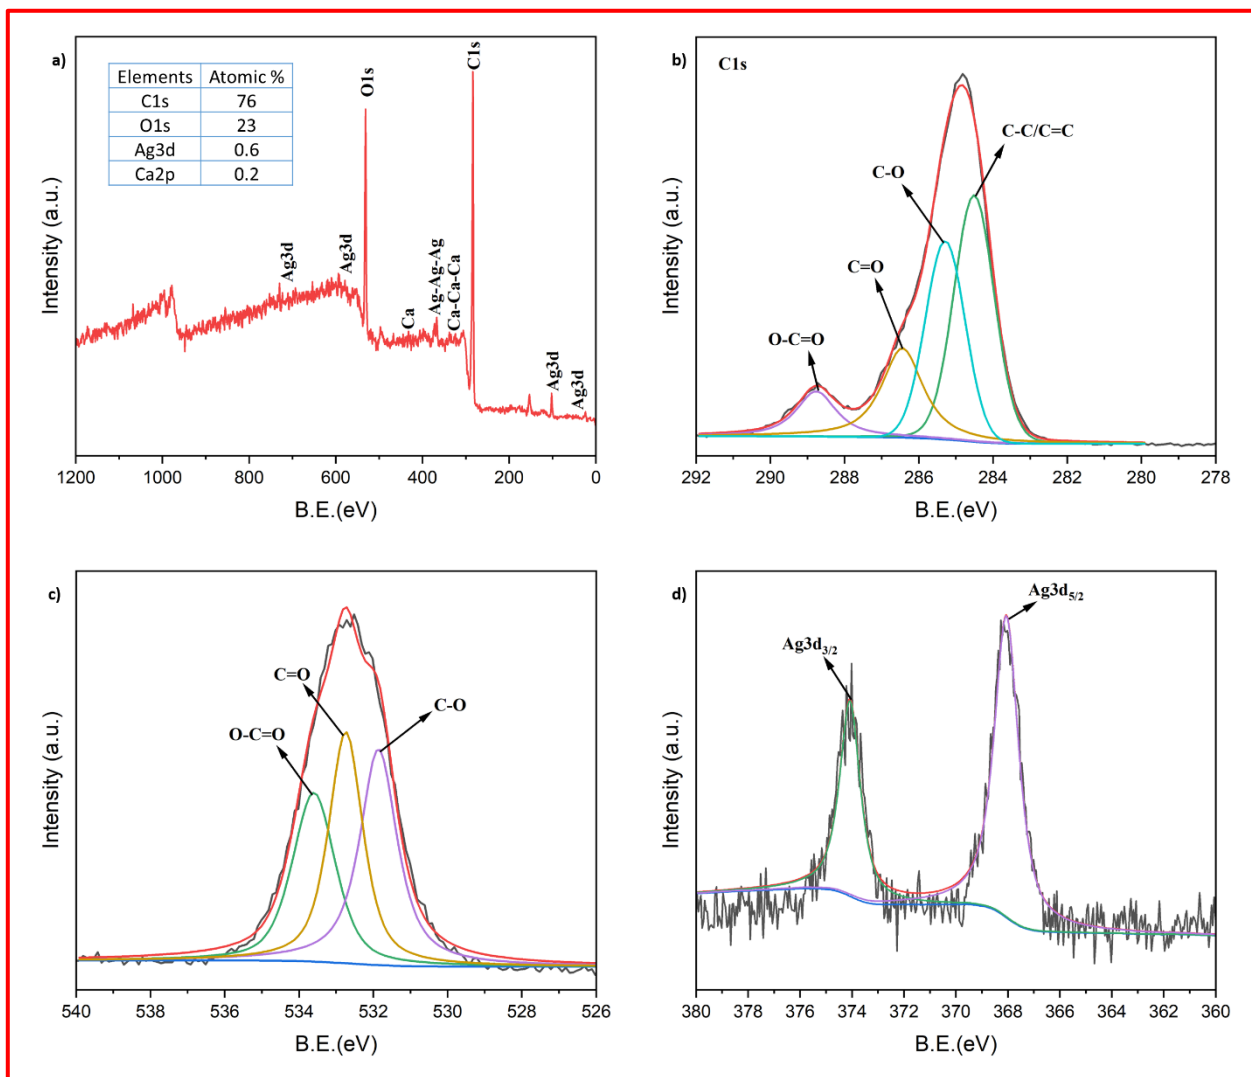

**Figure S3.** XPS spectra for the Ag@PBC 600 a) Ag@PBC survey, b) C1s, O1s and d) Ag3d.

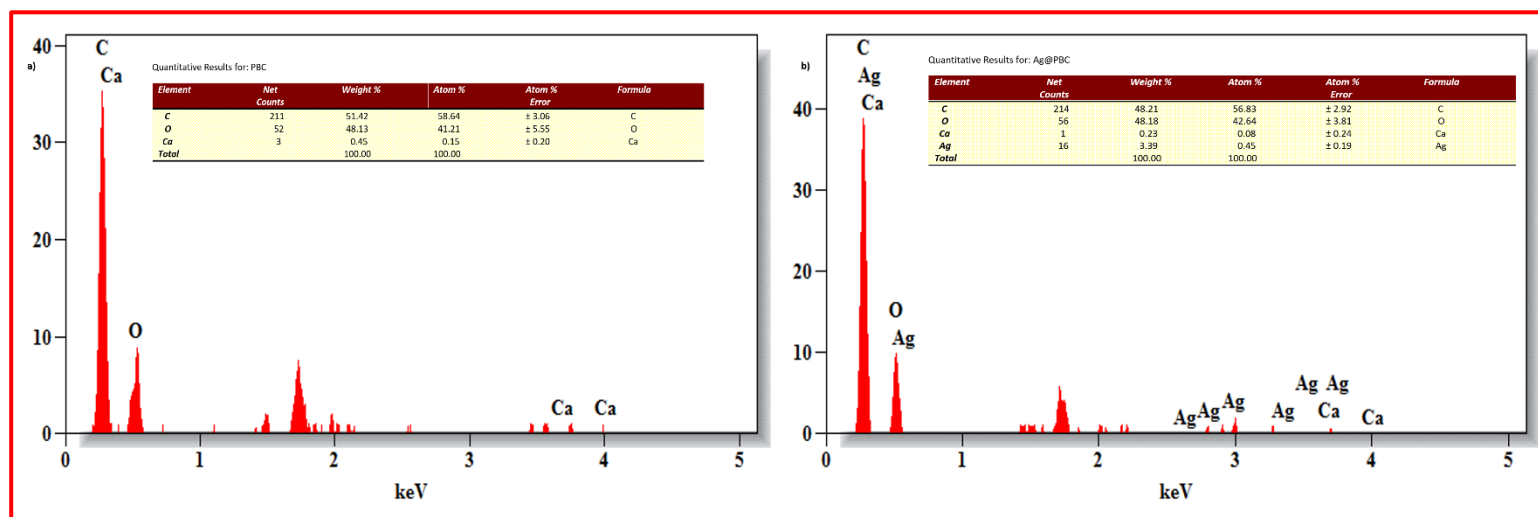

**Figure S4.** EDS spectra and elemental composition of (a) PBC and (b) Ag@PBC composite.

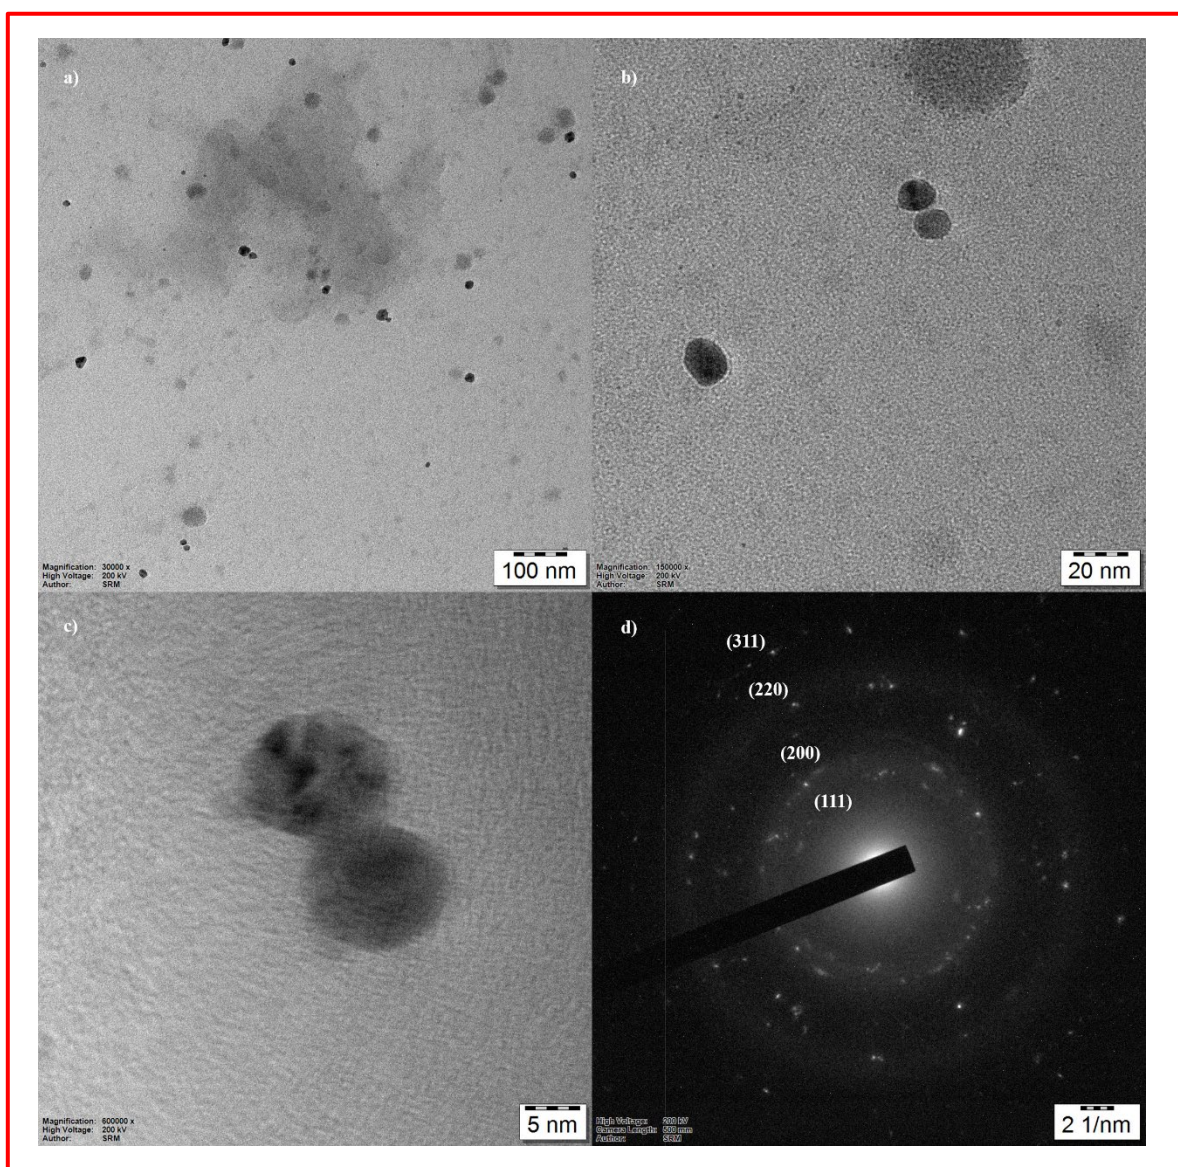

**Figure S5.** TEM images of Ag@PBC 300 composite at different magnifications (a–c) and the SAED pattern (d).



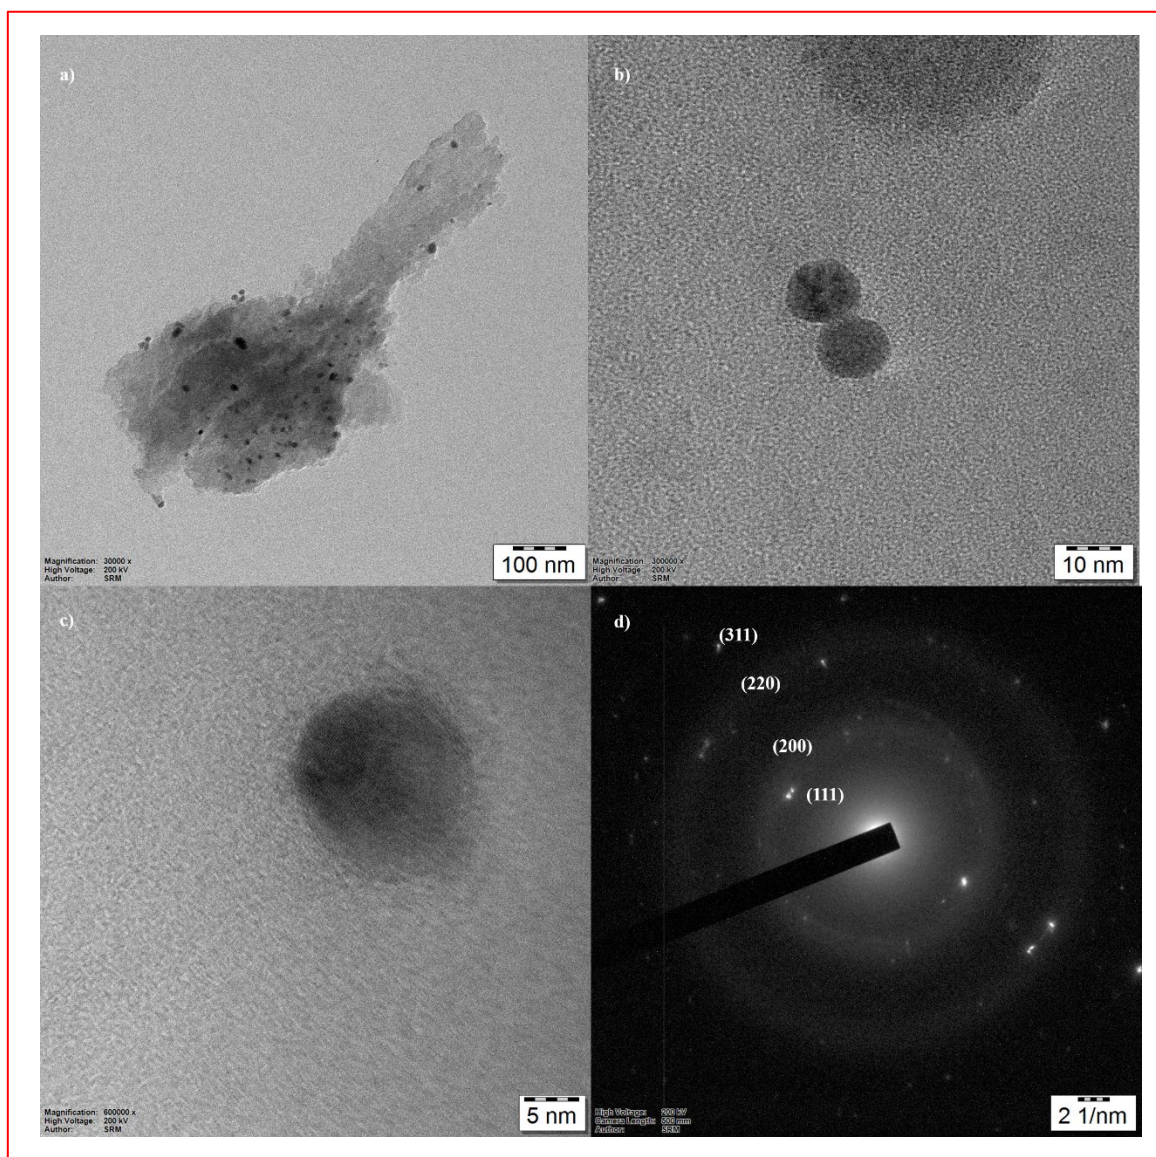

**Figure S6.** TEM images of Ag@PBC 400 composite at different magnifications (a–c) and the SAED pattern (d).

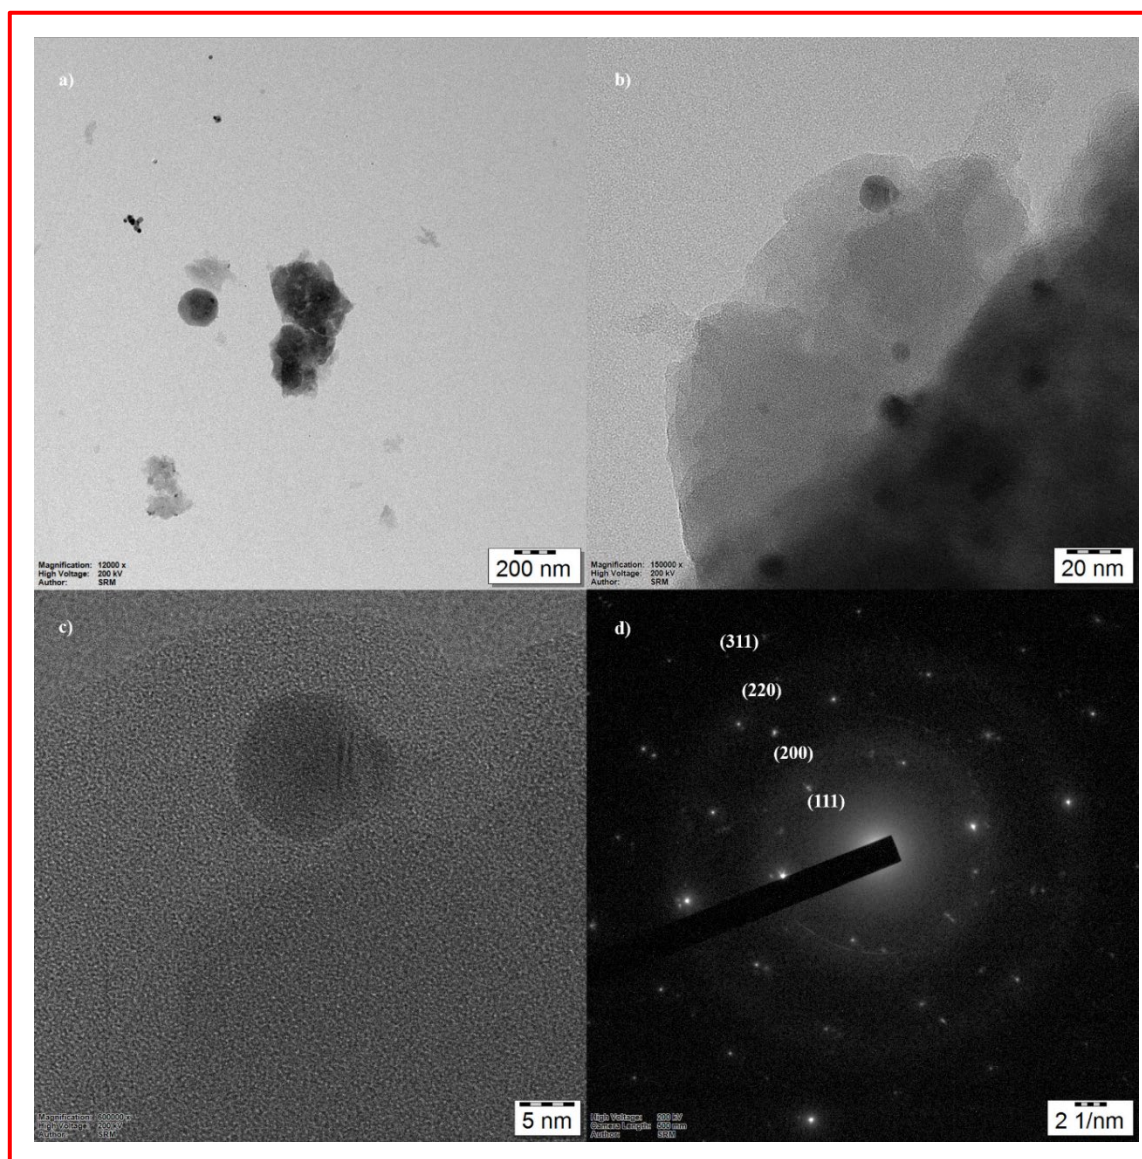

**Figure S7.** TEM images of Ag@PBC 600 composite at different magnifications (a–c) and the SAED pattern (d).



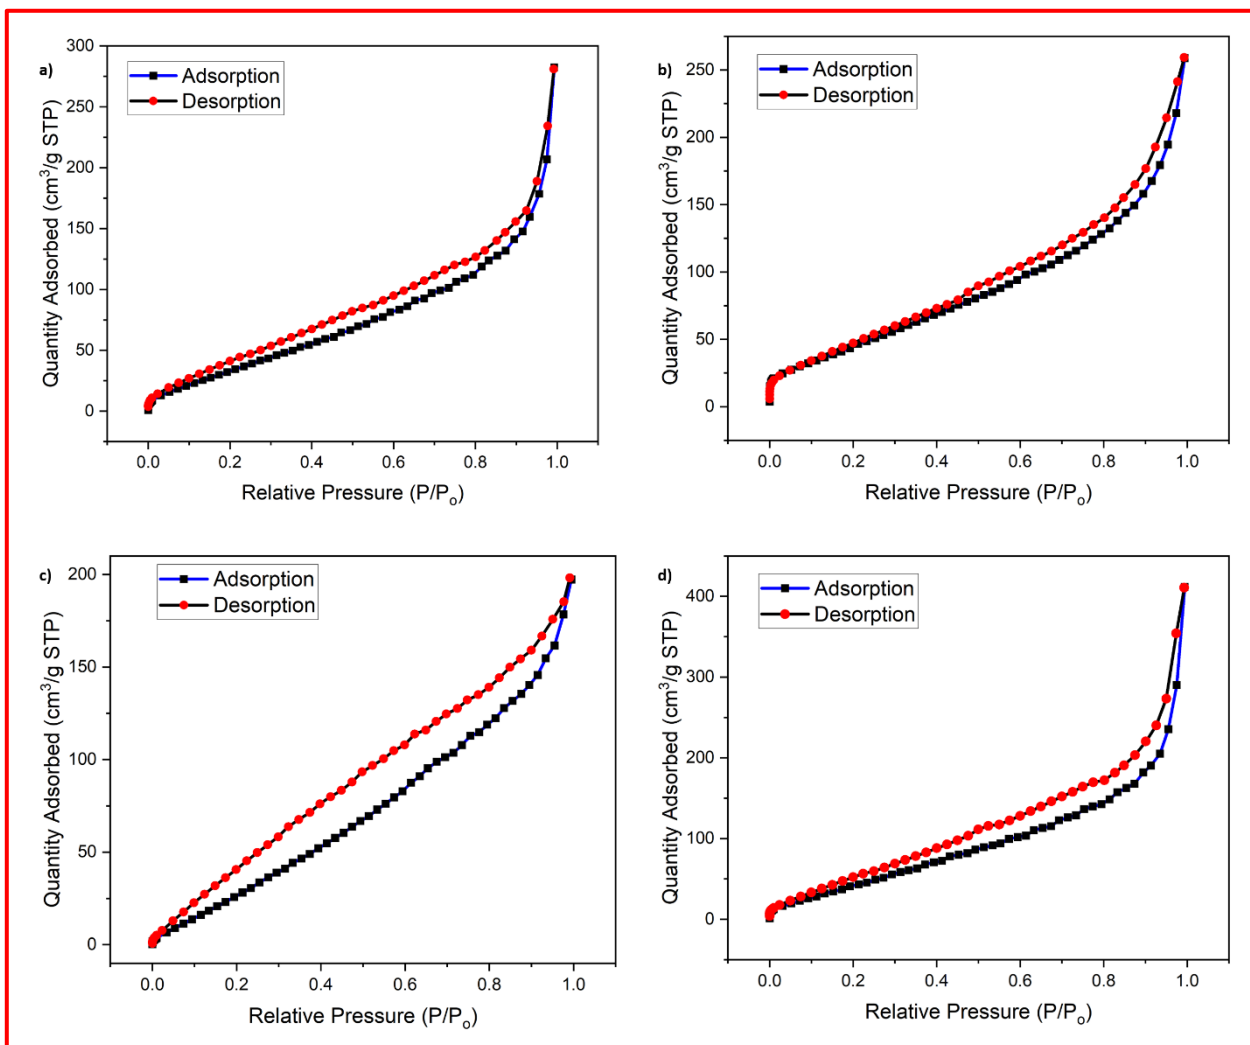

**Figure S8.** N<sub>2</sub> adsorption-desorption isotherms biochar a) PBC 300, b) PBC 600 and composites c) Ag@PBC 300 & d) Ag@PBC 600

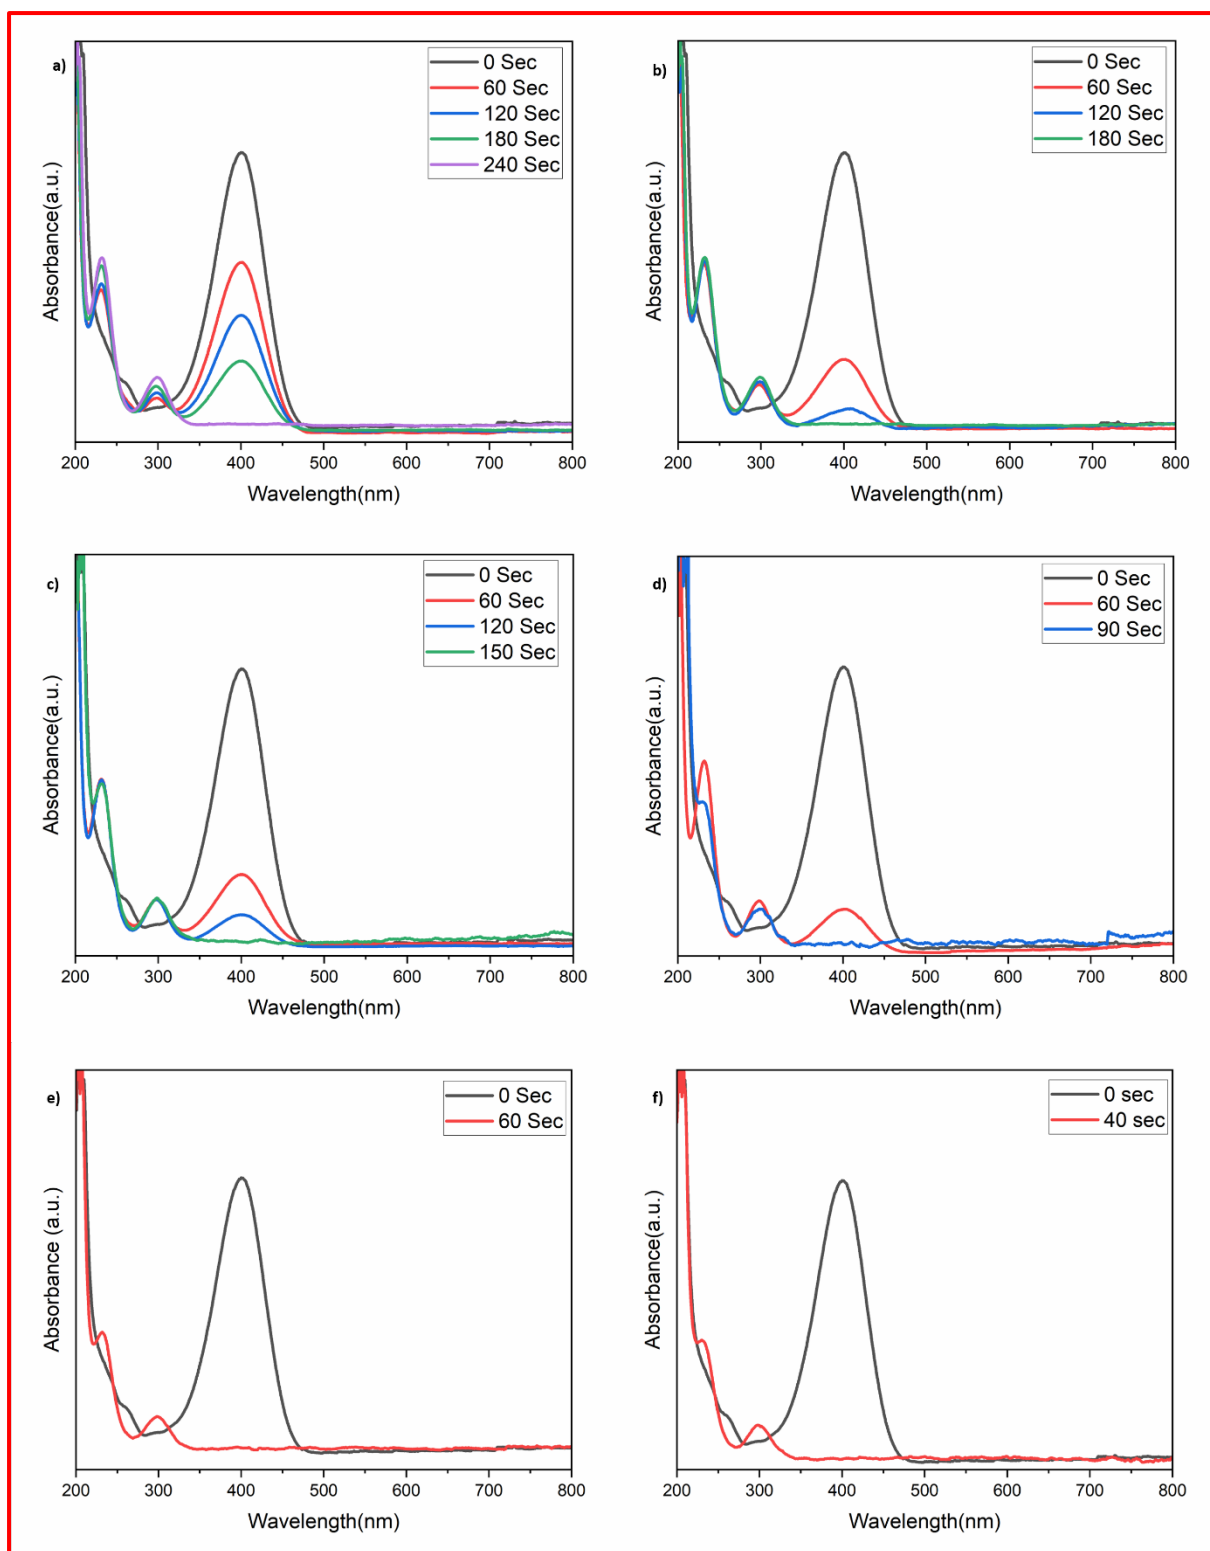

**Figure S9.** Time-dependent UV–Vis spectra showing the catalytic reduction of 4-nitrophenol to 4-aminophenol using Ag@PBC 300 at different molar ratios of 4-NP:NaBH<sub>4</sub>: (a) 1:5, (b) 1:10, (c) 1:25, (d) 1:50, (e) 1:75, and (f) 1:100.

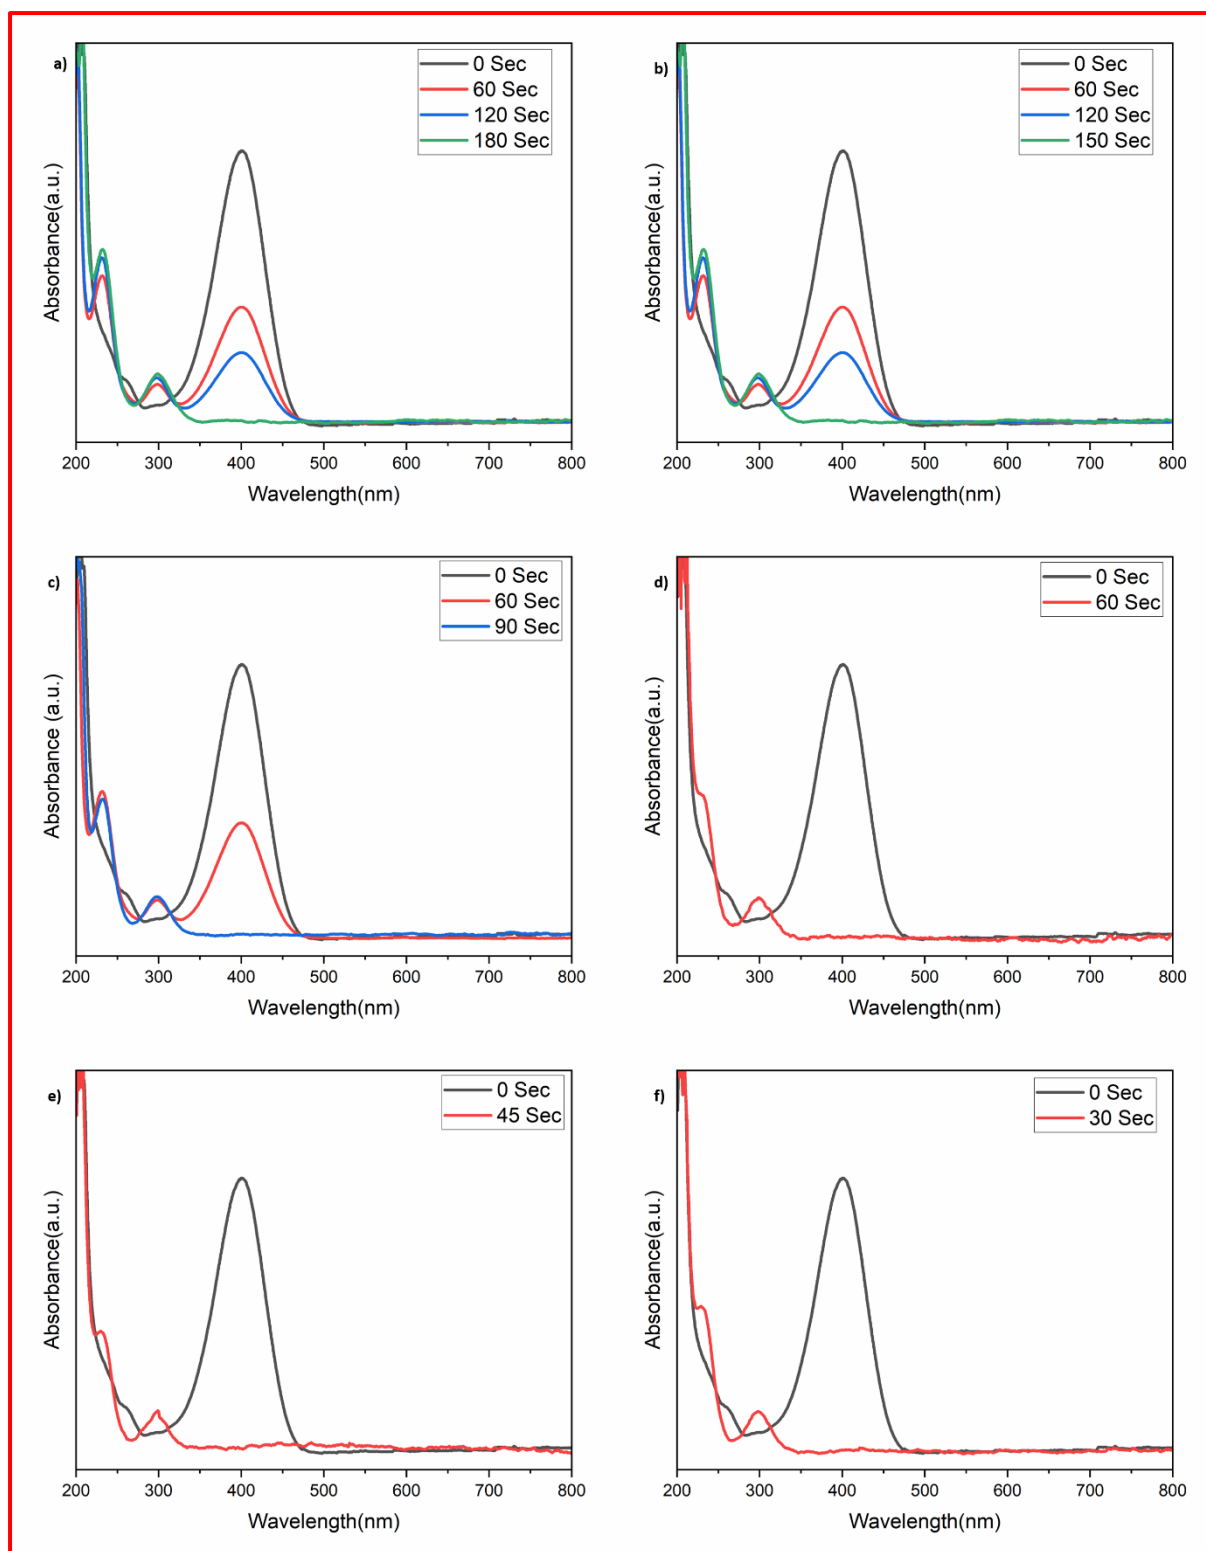

**Figure S10.** Time-dependent UV–Vis spectra showing the catalytic reduction of 4-nitrophenol to 4-aminophenol using Ag@PBC 400 at different molar ratios of 4-NP:NaBH<sub>4</sub>: (a) 1:5, (b) 1:10, (c) 1:25, (d) 1:50, (e) 1:75, and (f) 1:100.

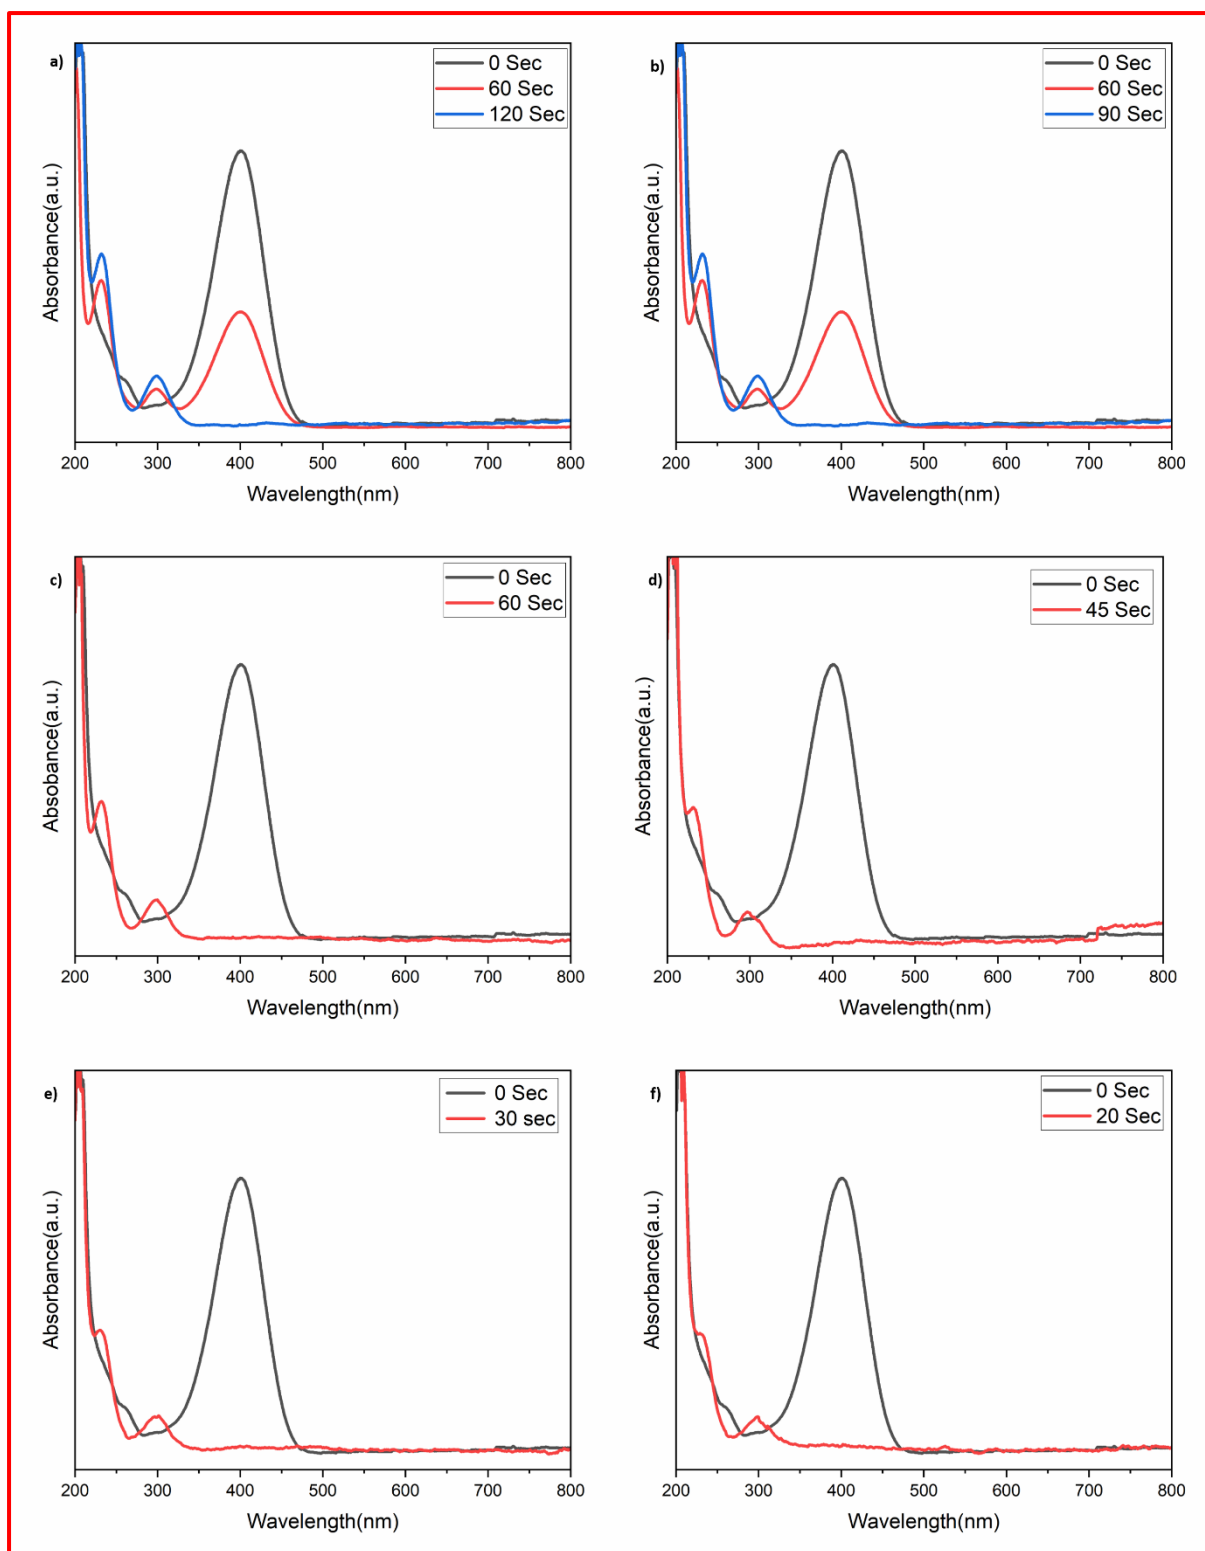

**Figure S11.** Time-dependent UV–Vis spectra showing the catalytic reduction of 4-nitrophenol to 4-aminophenol using Ag@PBC 500 at different molar ratios of 4-NP:NaBH<sub>4</sub>: (a) 1:5, (b) 1:10, (c) 1:25, (d) 1:50, (e) 1:75, and (f) 1:100.



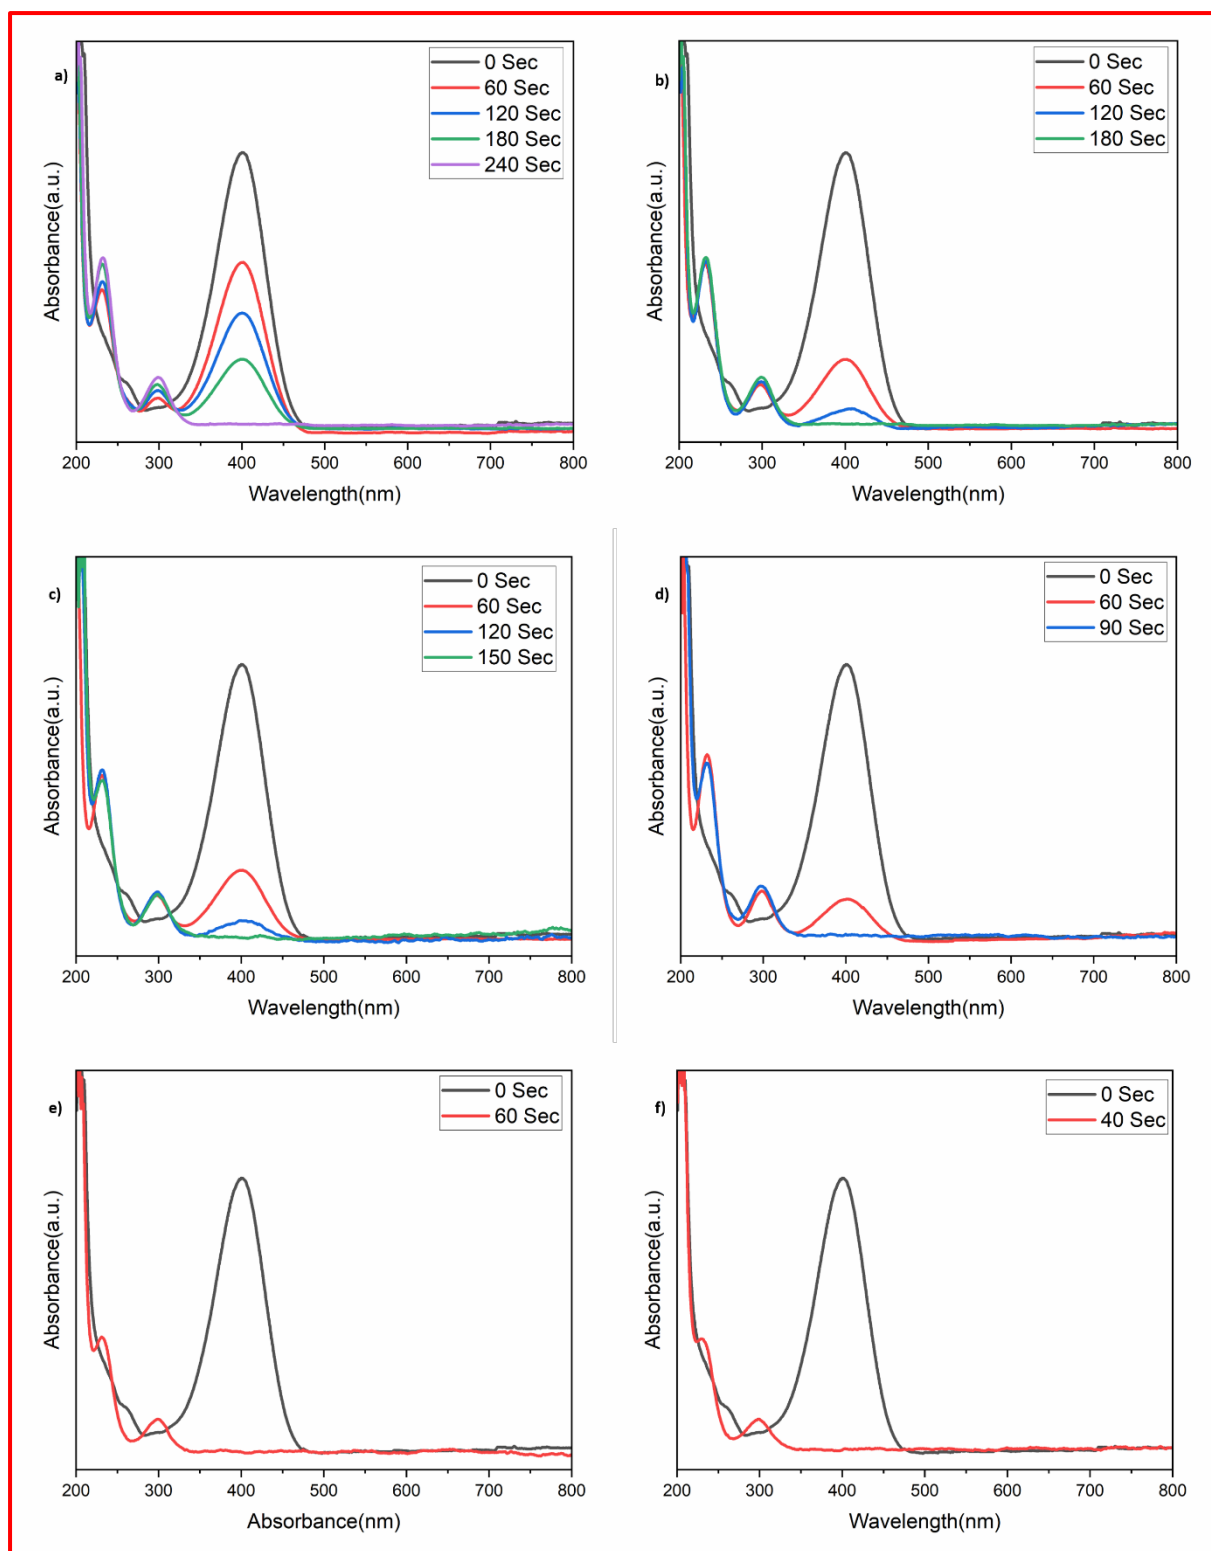

**Figure S12.** Time-dependent UV-Vis spectra showing the catalytic reduction of 4-nitrophenol to 4-aminophenol using Ag@PBC 600 at different molar ratios of 4-NP:NaBH<sub>4</sub>: (a) 1:5, (b) 1:10, (c) 1:25, (d) 1:50, (e) 1:75, and (f) 1:100.

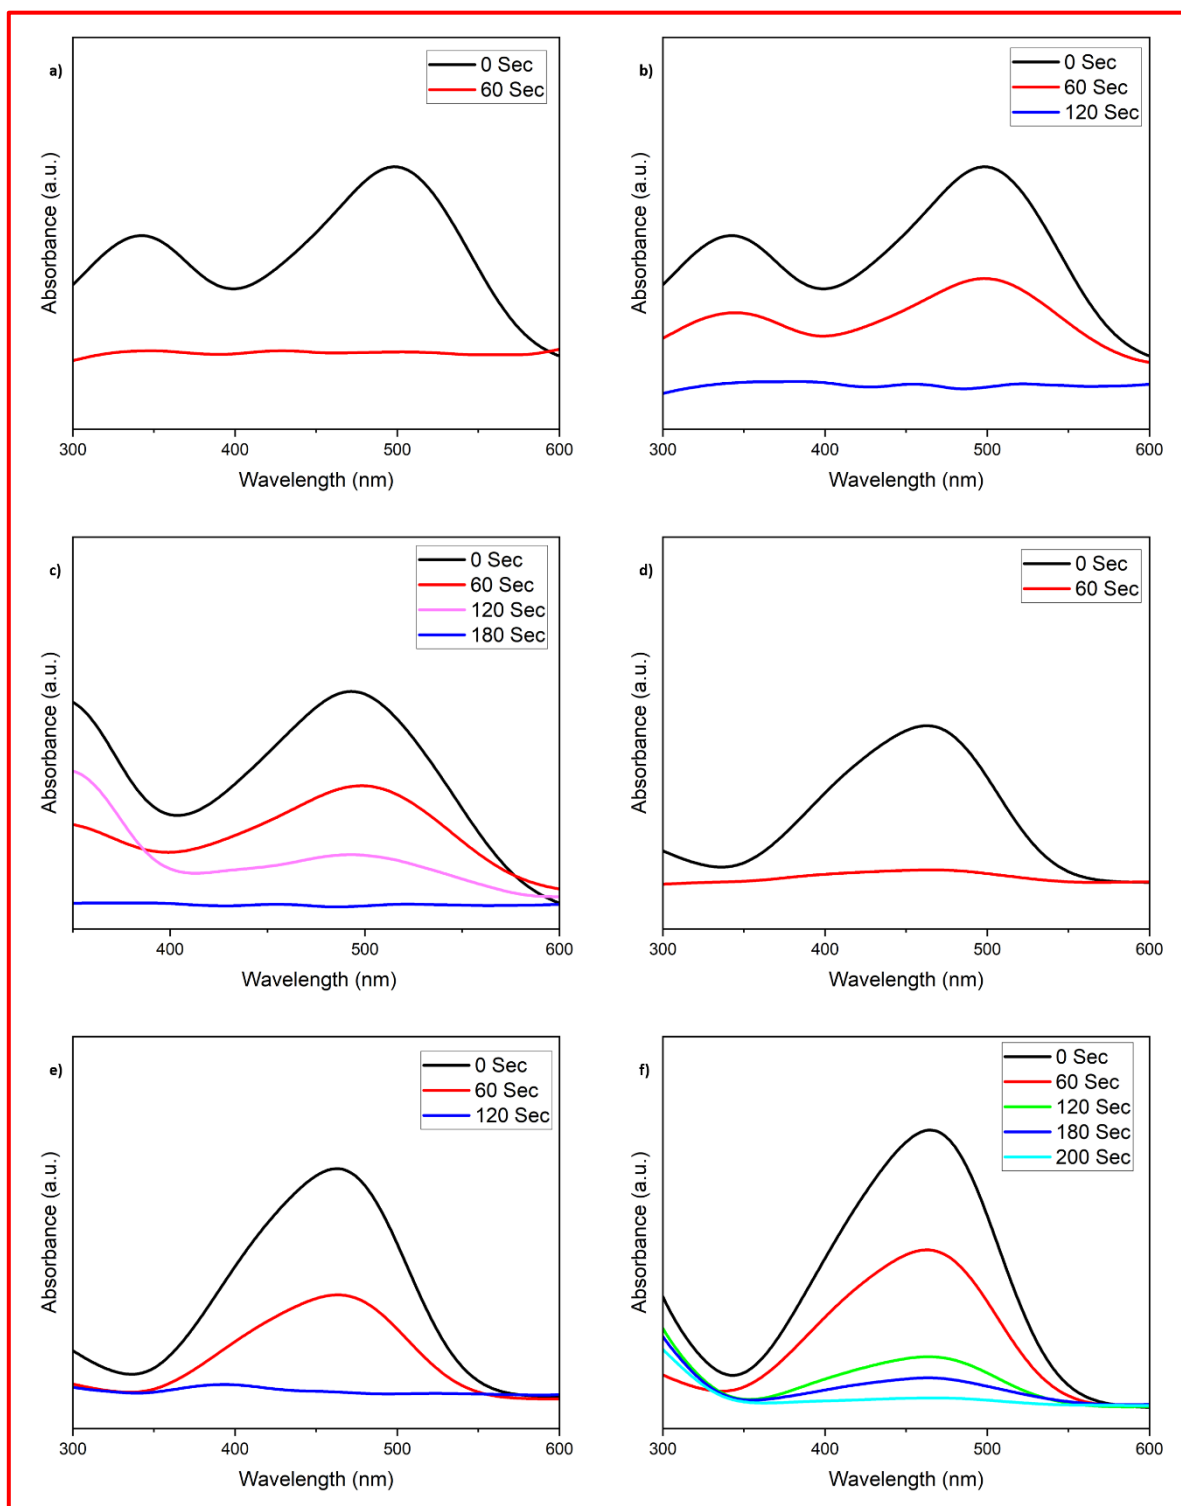

**Figure S13.** Time-dependent of absorbance showing the reduction of CR and MO at different concentrations 25ppm (a and d), 50ppm (b and e) and 100ppm (c and f) catalyzed by Ag@PBC 300.

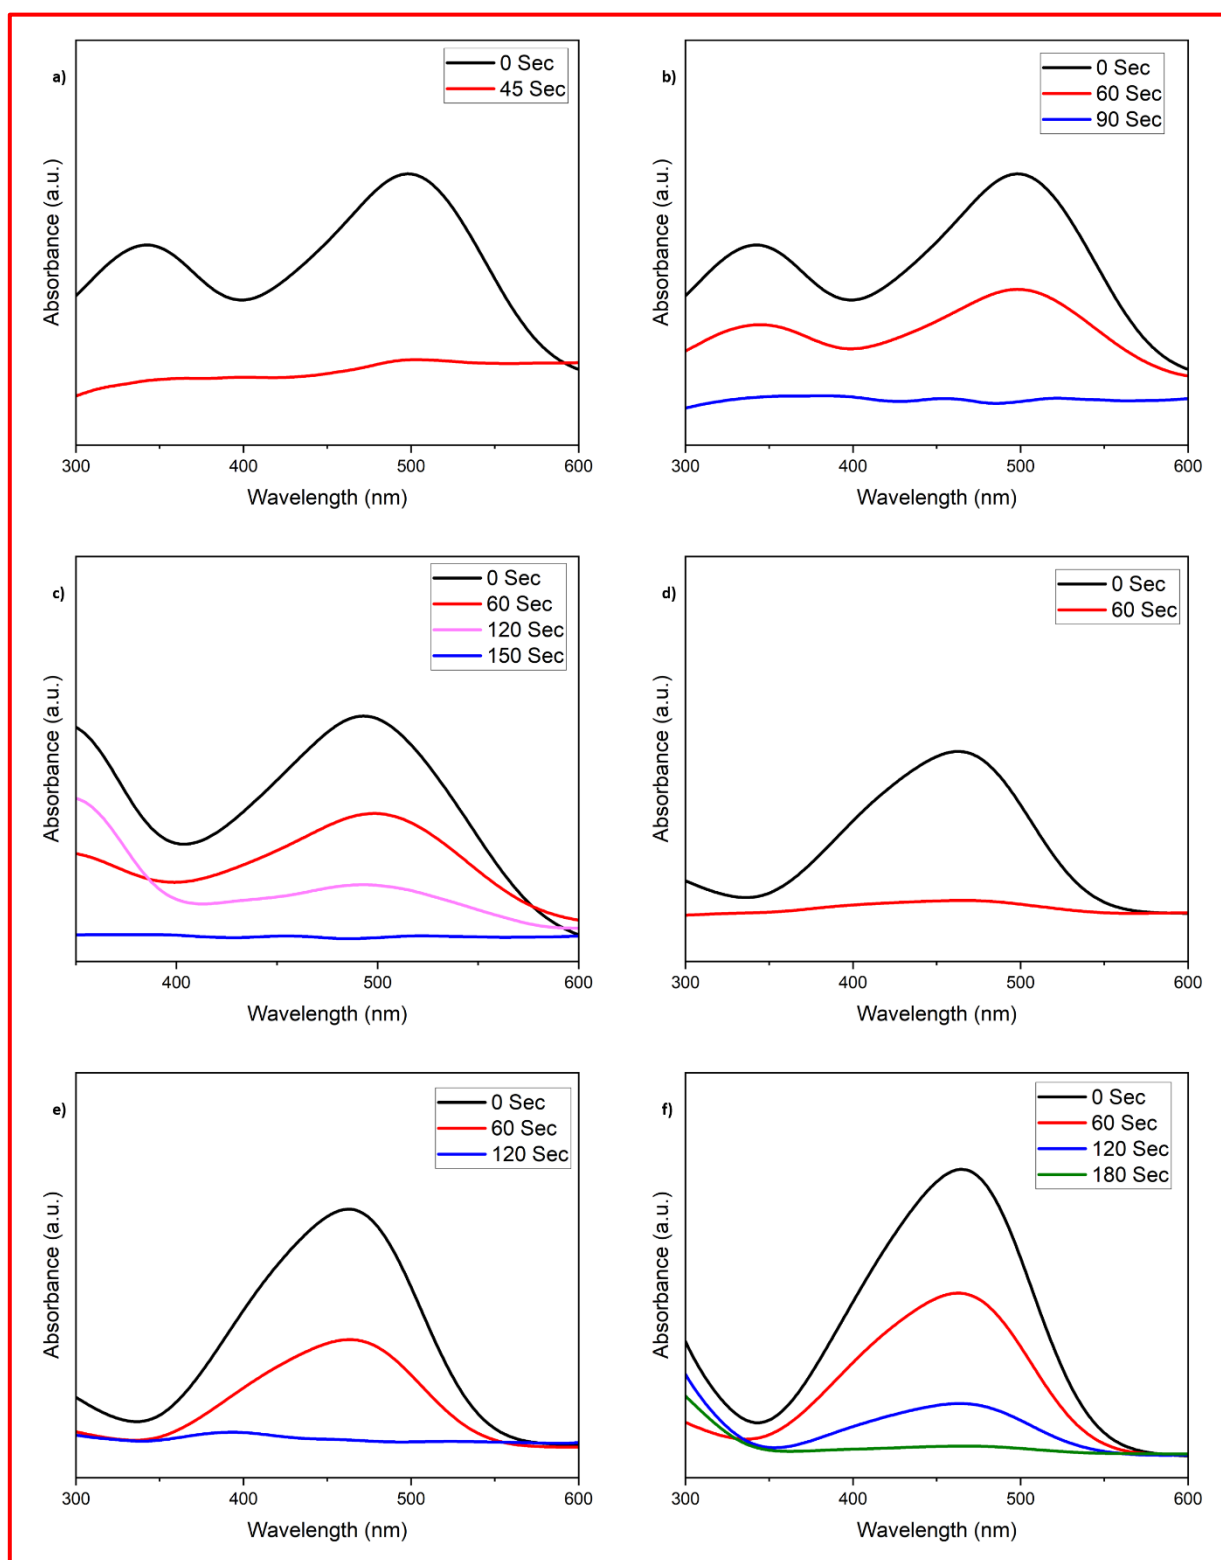

**Figure S14.** Time-dependent of absorbance showing the reduction of CR and MO at different concentrations 25ppm (a and d), 50ppm (b and e) and 100ppm (c and f) catalyzed by Ag@PBC 400.

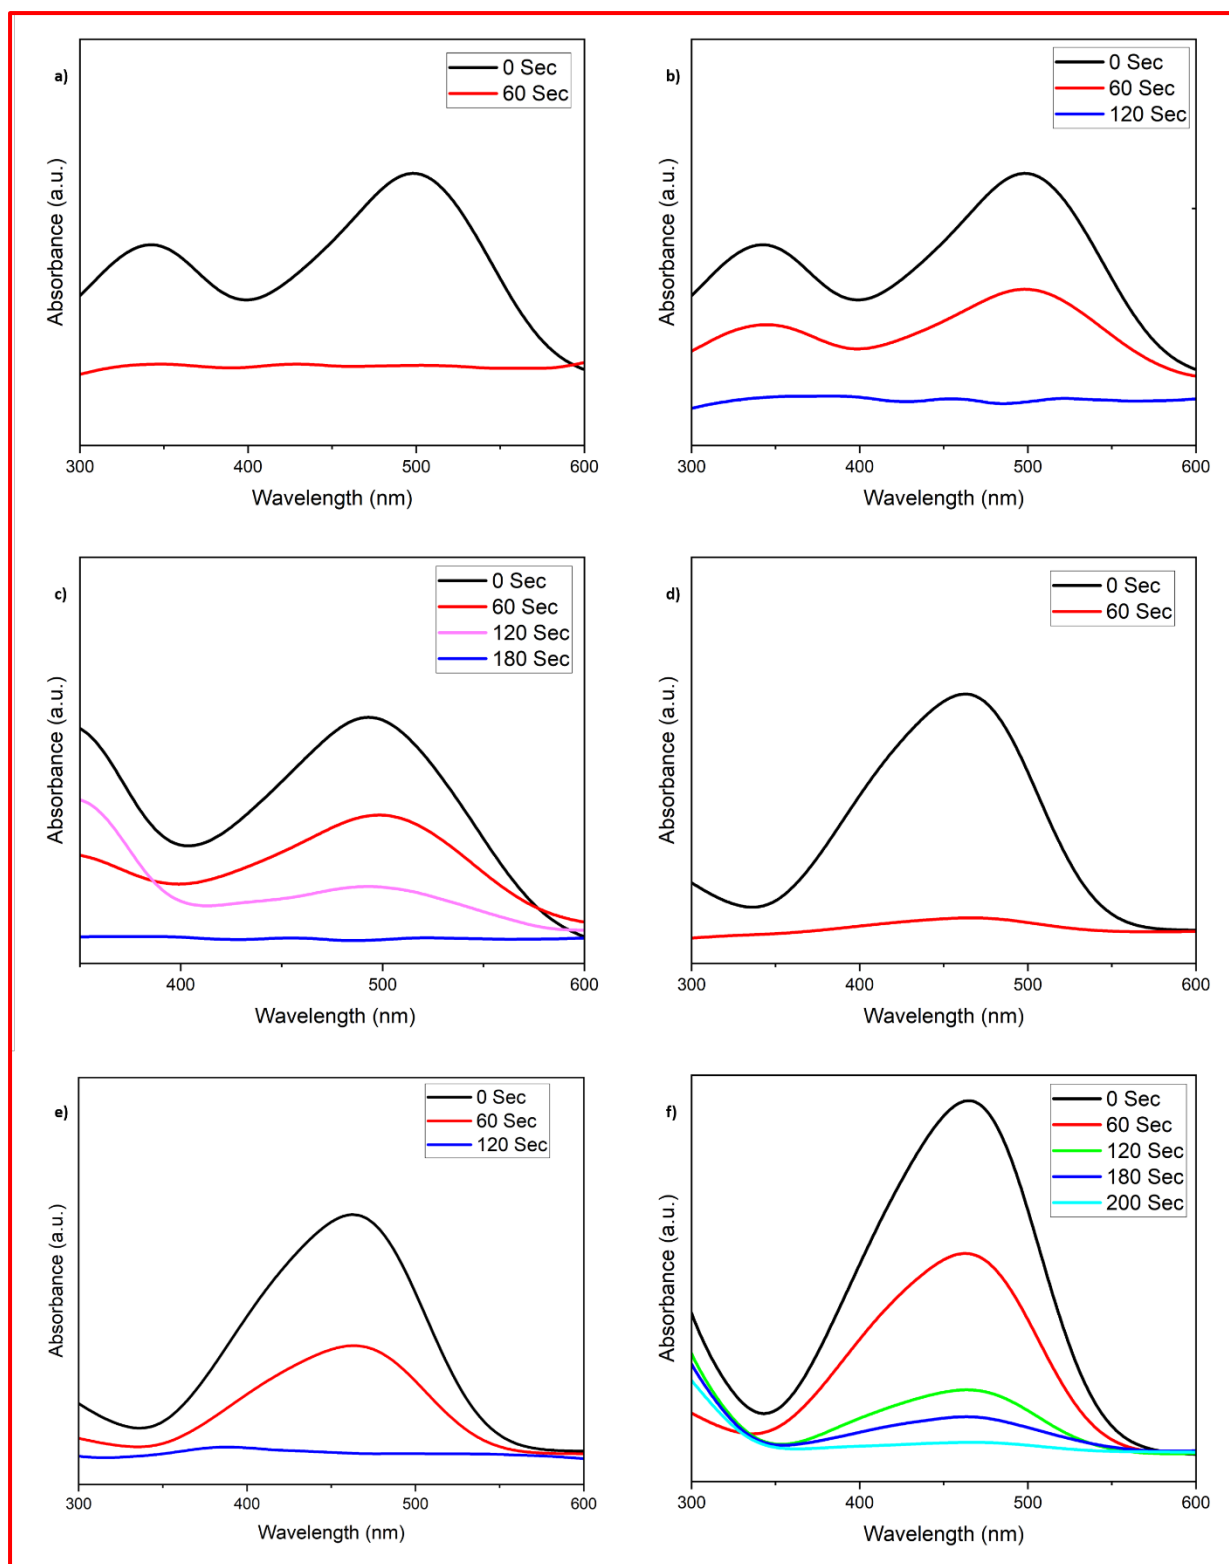

**Figure S15.** Time-dependent of absorbance showing the reduction of CR and MO at different concentrations 25ppm (a and d), 50ppm (b and e) and 100ppm (c and f) catalyzed by Ag@PBC 600.



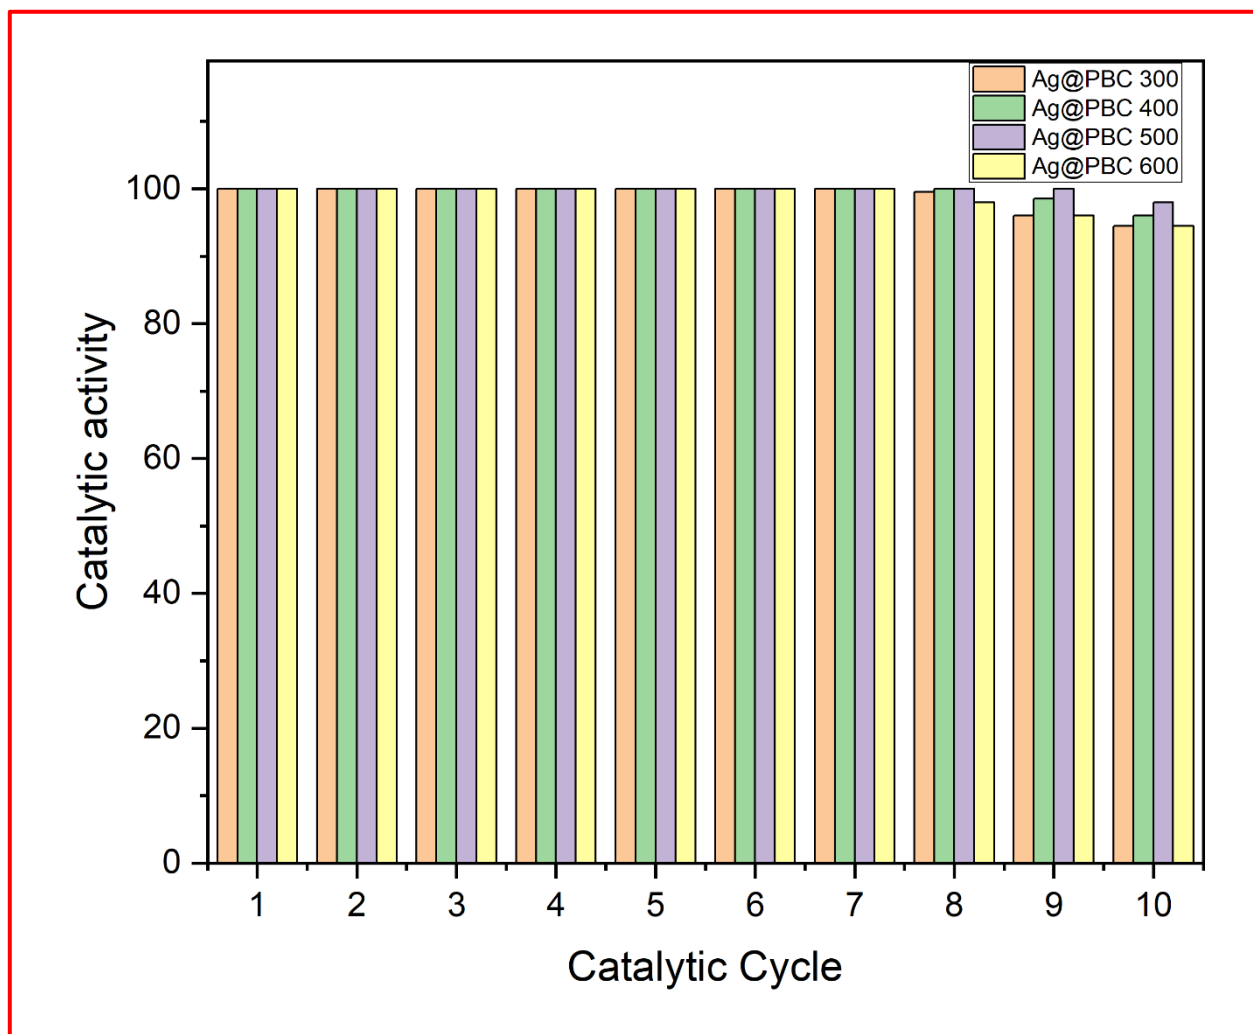

**Figure S16.** Reusability of Ag@PBC catalysts over 10 cycles.

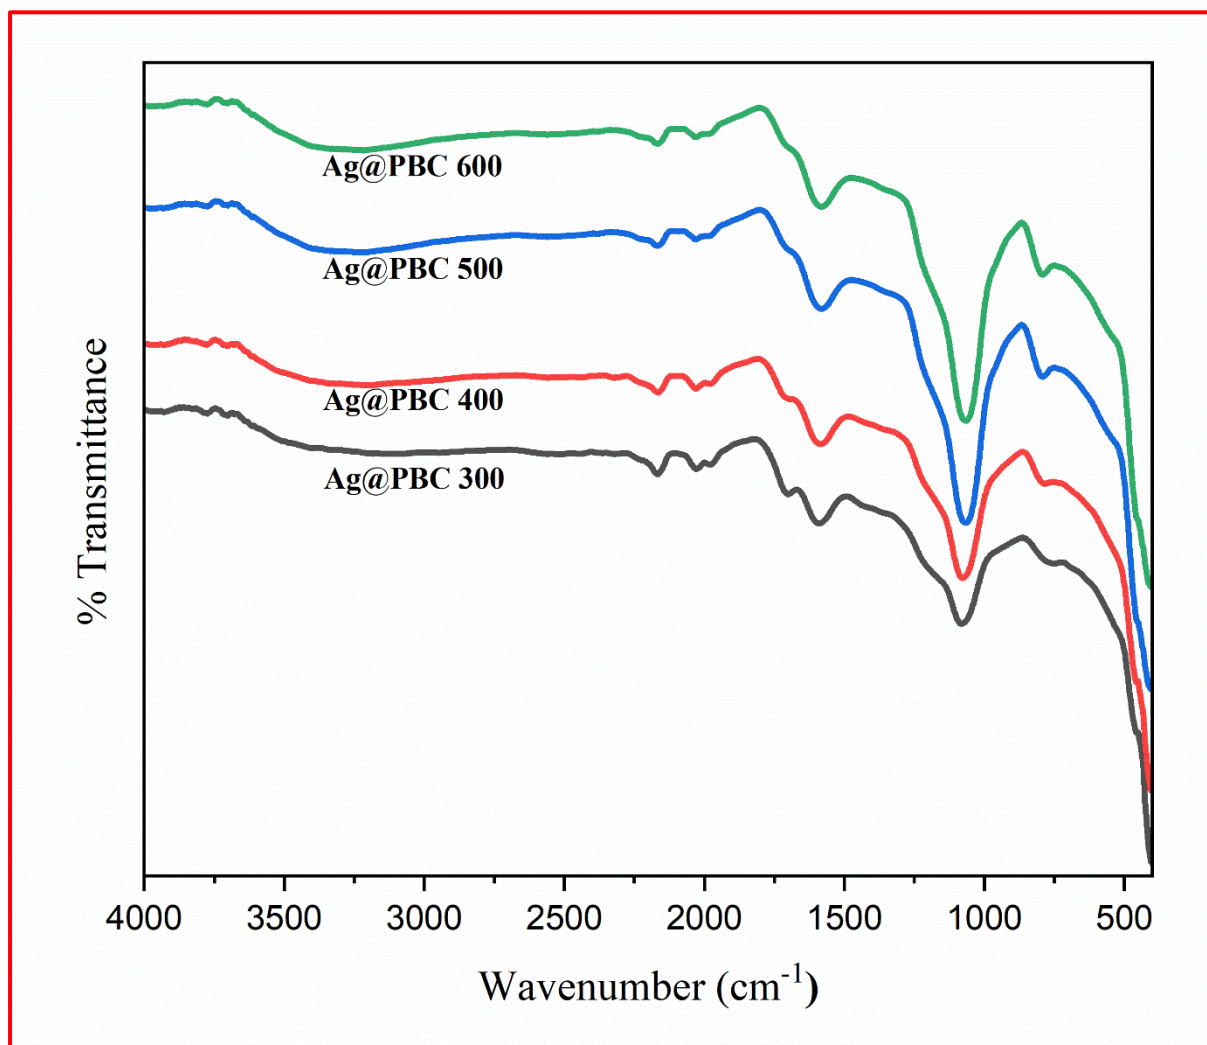

**Figure S17.** FTIR spectra of the Ag@PBC composites after 10<sup>th</sup> catalytic cycles.
